# Supplementary material for: The mutational landscape of MYCN, Lin28b and ALKF1174L driven murine neuroblastoma mimics human disease
Source: PubMed Central journal article supplement (PMC5823580; doi:10.18632/oncotarget.23614), 2017-12-22
Supplement: oncotarget-09-8334-s001.pdf [file oncotarget-09-8334-s001.pdf]

## The mutational landscape of *MYCN*, *Lin28b* and *ALK<sup>F1174L</sup>* driven murine neuroblastoma mimics human disease

### SUPPLEMENTARY MATERIALS

**Supplementary Table 1: Coverage statistics.** See\_Supplementary\_Table 1

**Supplementary Table 2: Non synonymous coding mutations in murine tumors.** See\_Supplementary\_Table 2

**Supplementary Table 3: Somatic mutations in murine tumors.** See\_Supplementary\_Table 3

**Supplementary Table 4: Murine tumor characteristics.** See\_Supplementary\_Table 4

**Supplementary Table 5: t-dicer expression ratio.** See\_Supplementary\_Table 5

### Supplementary Table 6: Human neuroblastoma sample characteristics.

| INSS stage                                |     |        |
|-------------------------------------------|-----|--------|
| 1                                         | 31  | 11.23% |
| 2                                         | 26  | 9.42%  |
| 3                                         | 28  | 10.14% |
| 4                                         | 89  | 32.25% |
| 4S                                        | 19  | 6.88%  |
| Age groups                                |     |        |
| less than 1 year                          | 69  | 25.00% |
| over 1 year                               | 124 | 44.93% |
| Age at diagnosis distribution (in months) |     |        |
| minimum                                   | 0   |        |
| 1rst quartile                             | 6   |        |
| median                                    | 18  |        |
| 3rd quartile                              | 34  |        |
| maximum                                   | 163 |        |
| MYCN status                               |     |        |
| amplified                                 | 38  | 13.77% |
| non amplified                             | 154 | 55.80% |
| Array CGH profile subtype                 |     |        |
| 1                                         | 71  | 25.72% |
| 2a                                        | 45  | 16.30% |
| 2b                                        | 30  | 10.87% |
